# Supplementary material for: CircRNA has_circ_0017109 promotes lung tumor progression via activation of Wnt/β-catenin signaling due to modulating miR-671-5p/FZD4 axis
Source: PubMed Central journal article supplement (PMC9700975; doi:10.1186/s12890-022-02209-2), 2022-11-24

Westernblot raw data for Fig 2E

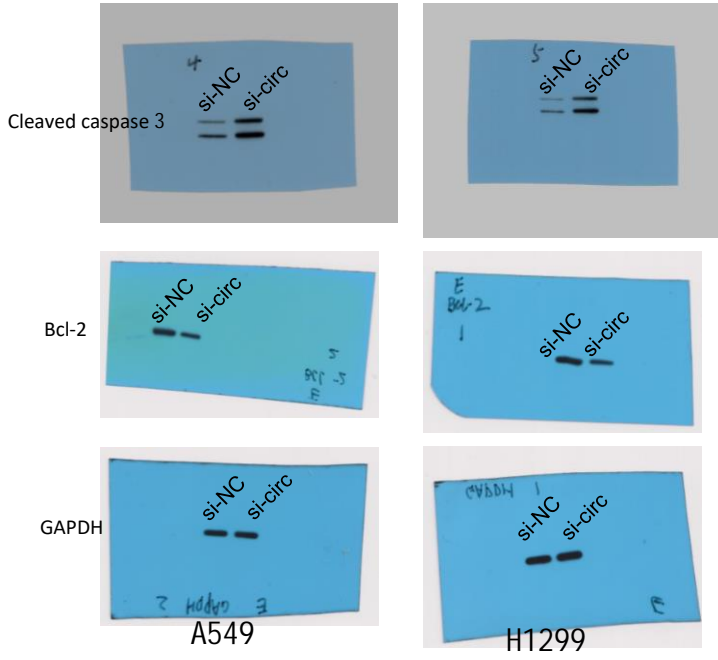

Westernblot raw data for Fig 5A

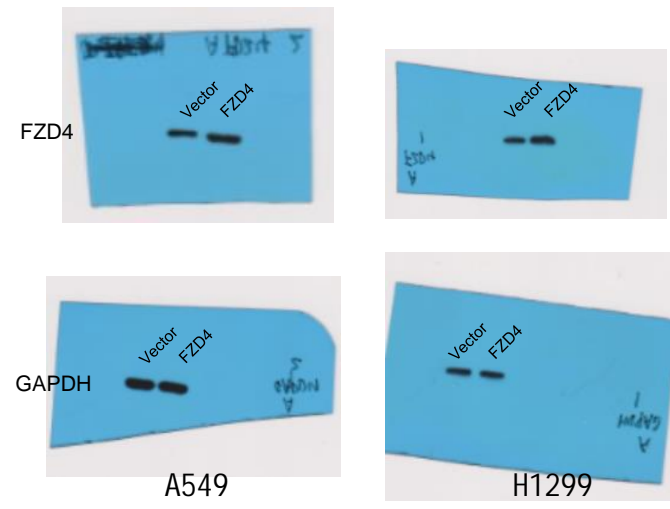

Westernblot raw data for Fig 4C

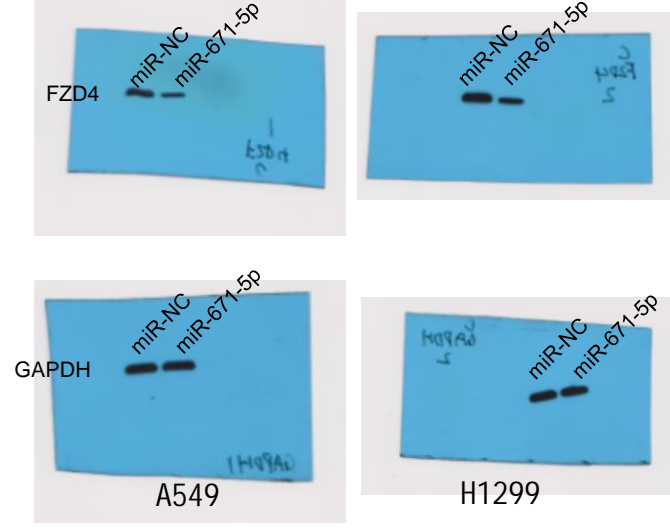

Westernblot raw data for Fig 4D

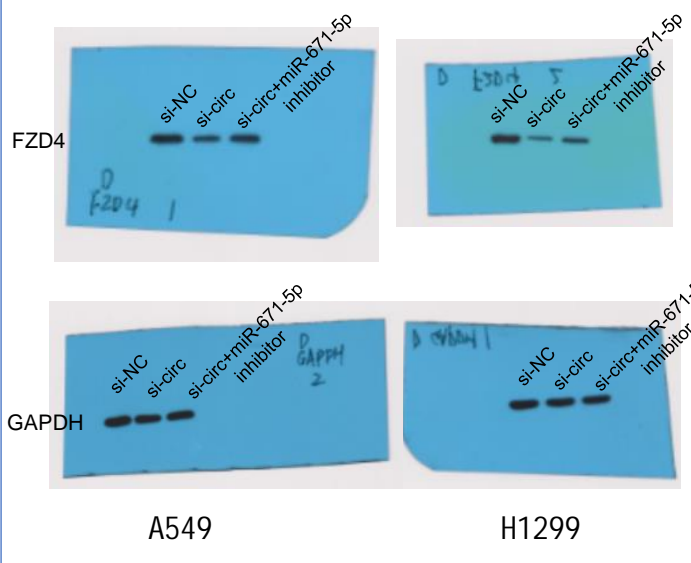

Westernblot raw data for Fig 5E

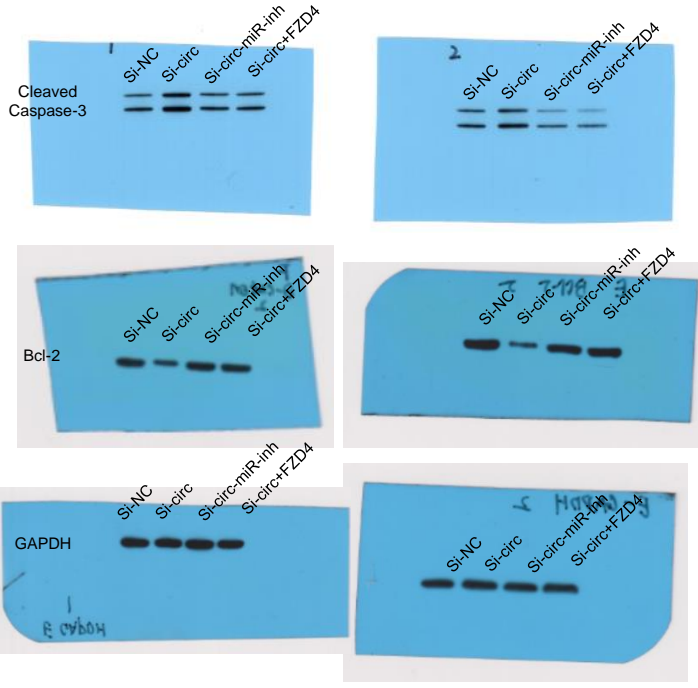

A549

H1299

**Westernblot raw data for Fig 5F**

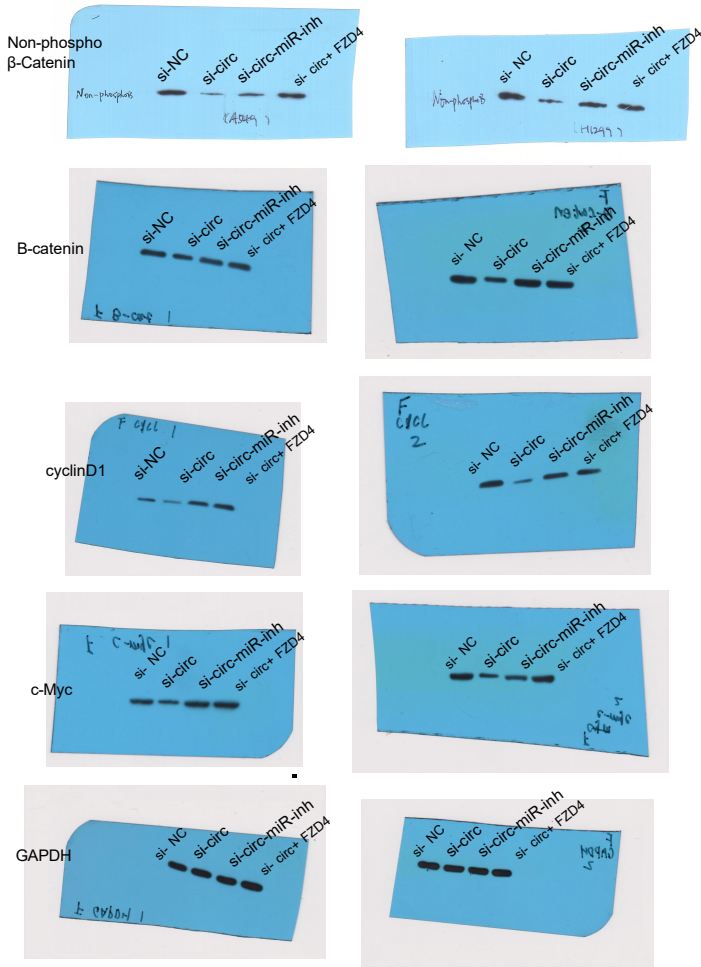

A549

H1299

**Westernblot raw data for Fig 6C**

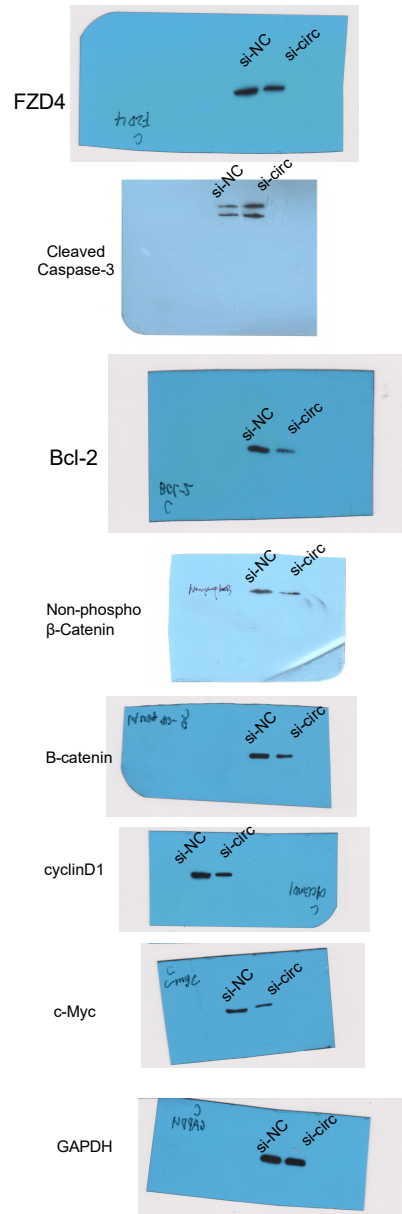

Supplement: 12890_2022_2209_MOESM4_ESM.pdf [file 12890_2022_2209_MOESM4_ESM.pdf]
